# Supplementary material for: Influence of void-free perovskite capping layer on the charge recombination process in high performance CH3NH3PbI3perovskite solar cells
Source: Royal Society of Chemistry journal article supplement (doi:10.1039/c5nr06362k), 2016-01-01
Supplement: c5nr06362k1.pdf [file c5nr06362k1.pdf]

# Influence of Void-Free Perovskite Capping Layer on the Charge Recombination Process in High Performance $\text{CH}_3\text{NH}_3\text{PbI}_3$ Perovskite Solar Cells

Kunwu Fu<sup>1,2</sup>, Christopher T. Nelson<sup>3,4</sup>, Mary Cooper Scott<sup>3,4</sup>, Andrew Minor<sup>3,4</sup>, Nripan Mathews<sup>1,2,3\*</sup> and Lydia Helena Wong<sup>1,2\*</sup>

1. Energy Research Institute @ NTU (ERI@N), Nanyang Technological University, Research Techno Plaza, 50 Nanyang Drive, 637553, Singapore
2. School of Materials Science and Engineering, Nanyang Technological University, Block N4.1, 50 Nanyang Avenue, 639798, Singapore
3. Singapore-Berkeley Research Initiative for Sustainable Energy, 1 Create Way, 138602, Singapore
4. Molecular Foundry at Lawrence Berkeley National Laboratory, One Cyclotron Rd, NCEM Bldg. 72, University of California Berkeley, California 94720, US

## Supplementary Information

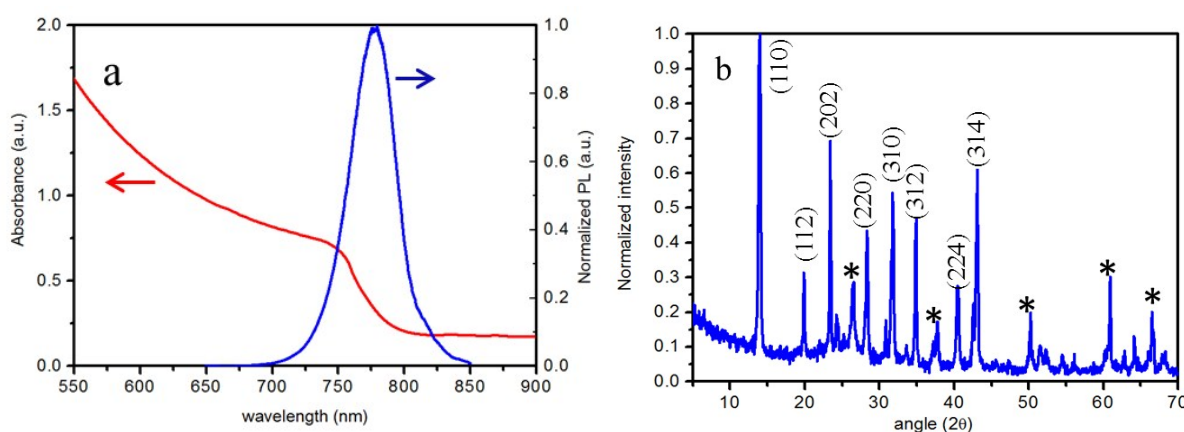

Figure S1 (a) UV-Vis absorbance spectra and normalized PL spectra & (b) normalized XRD pattern of  $\text{CH}_3\text{NH}_3\text{PbI}_3$  perovskite film made by single deposition on compact  $\text{TiO}_2$  substrate. The XRD peaks from  $\text{TiO}_2$  substrate are marked with \*. Onset of absorbance and the PL peak match well. XRD pattern shows that  $\text{CH}_3\text{NH}_3\text{PbI}_3$  perovskite has tetragonal crystal structure at room temperature

condition and belongs to the  $I4/mcm$  crystal structure group with lattice parameter of  $a = 8.87(1)$  Å,  $c = 12.61(1)$  Å.

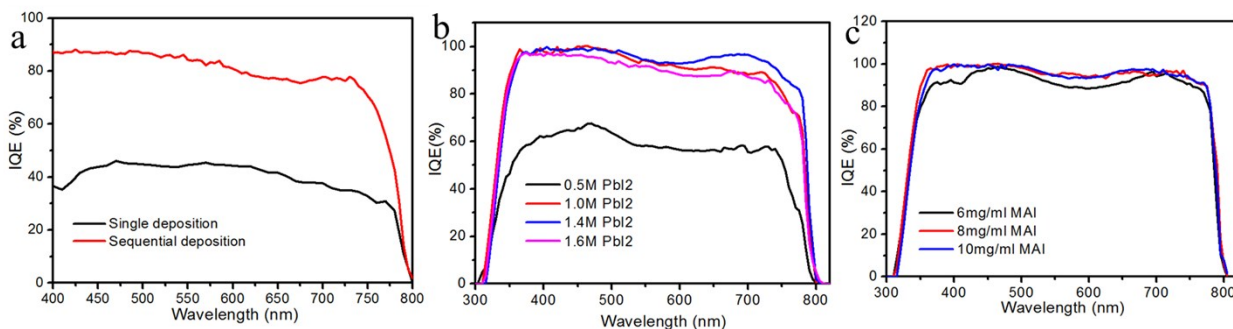

Figure S2 IQE spectra of  $\text{CH}_3\text{NH}_3\text{PbI}_3$  perovskite devices fabricated by (a) single deposition and sequential deposition processes, (b) sequential deposition process with different concentration  $\text{PbI}_2$  precursor solutions and (c) with different concentration MAI precursor solutions.

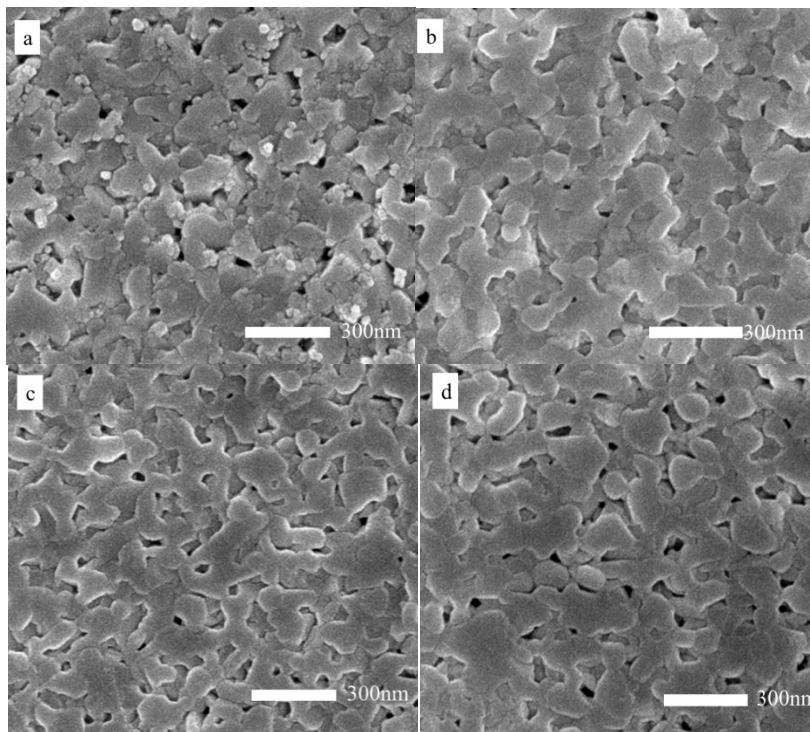

Figure S3 Top surface view SEM images of  $\text{PbI}_2$  films produced by spincoating from various precursor solutions: (a) 0.5 M, (b) 1M, (c) 1.4 M and (d) 1.6 M  $\text{PbI}_2$  solution.

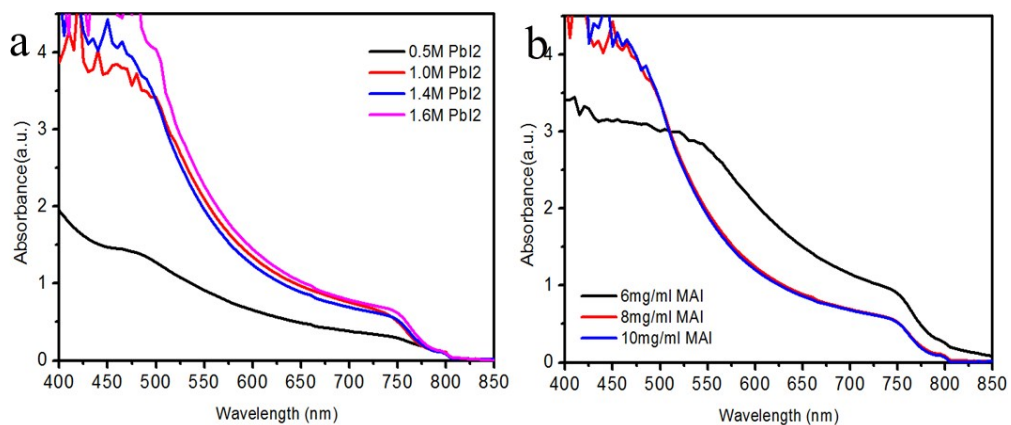

Figure S4 UV-Vis absorbance spectra of  $\text{CH}_3\text{NH}_3\text{PbI}_3$  perovskite films on mesoporous  $\text{TiO}_2$  substrates by sequential deposition perovskite samples from various (a)  $\text{PbI}_2$  and (b) MAI precursor solution with different concentrations.

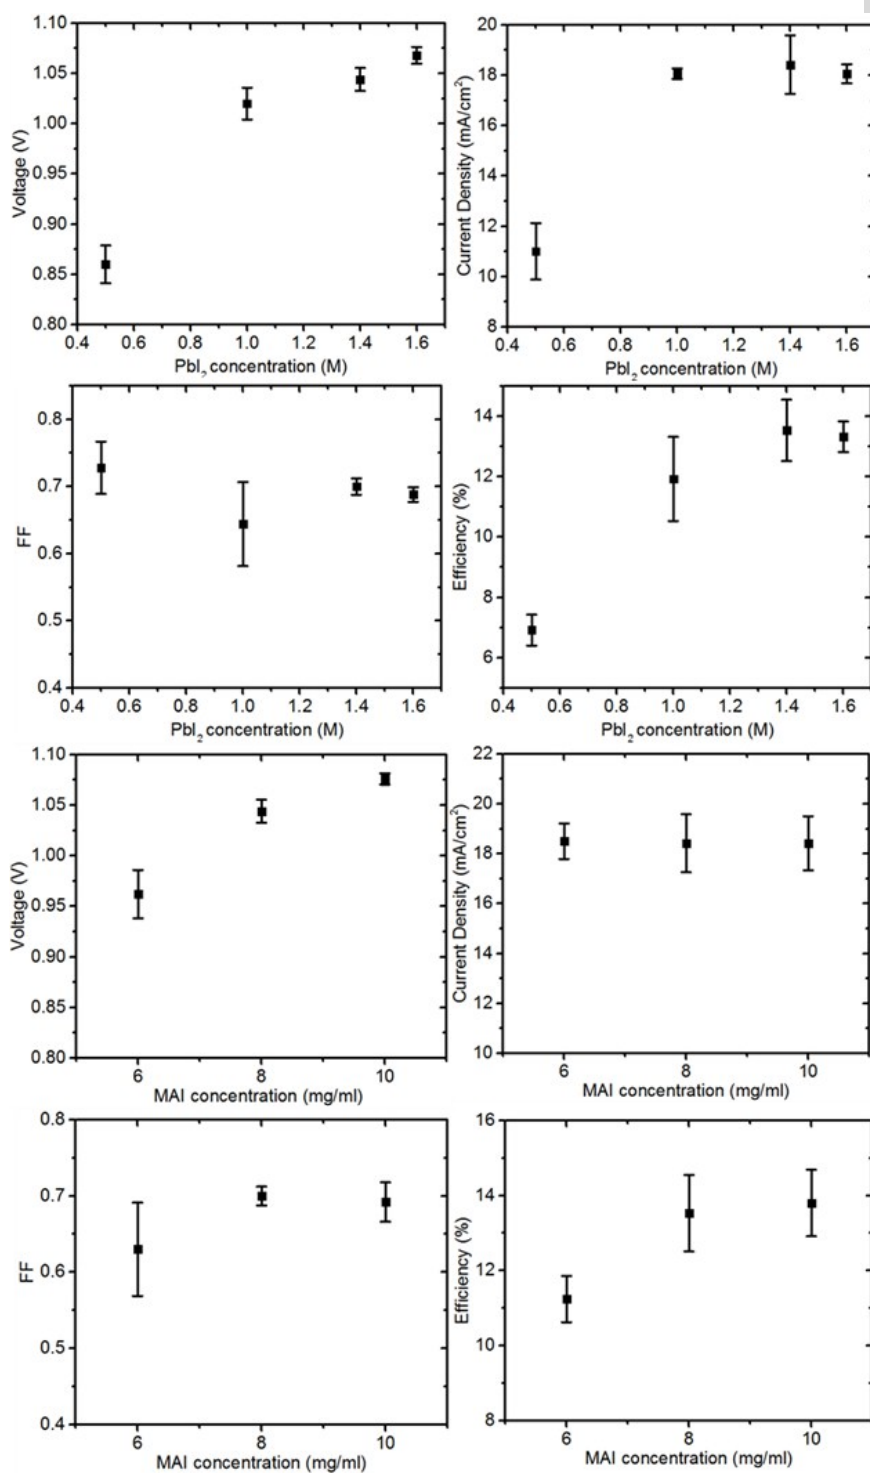

Figure S5 Statistics of mesoscopic perovskite solar cells fabricated with various PbI<sub>2</sub> and MAI precursor concentrations.

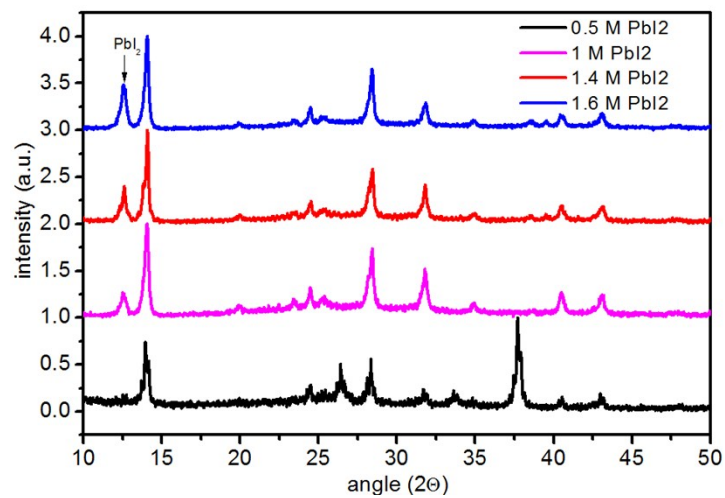

Figure S6 Normalized XRD pattern of MAPbI<sub>3</sub> perovskite film produced by sequential deposition from PbI<sub>2</sub> precursor solutions with various concentrations.

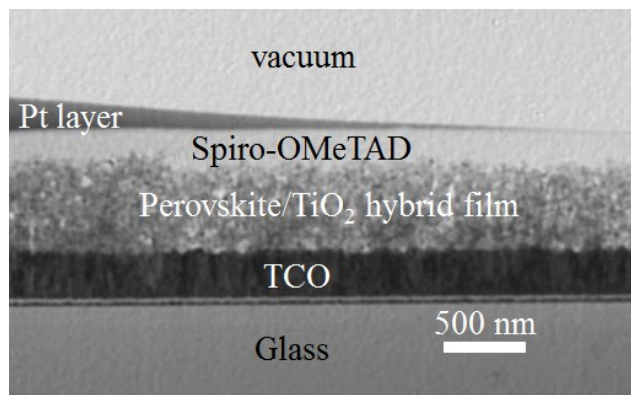

Figure S7 Cross section view of FIB prepared perovskite/mesoporous TiO<sub>2</sub> sample for TEM analysis.

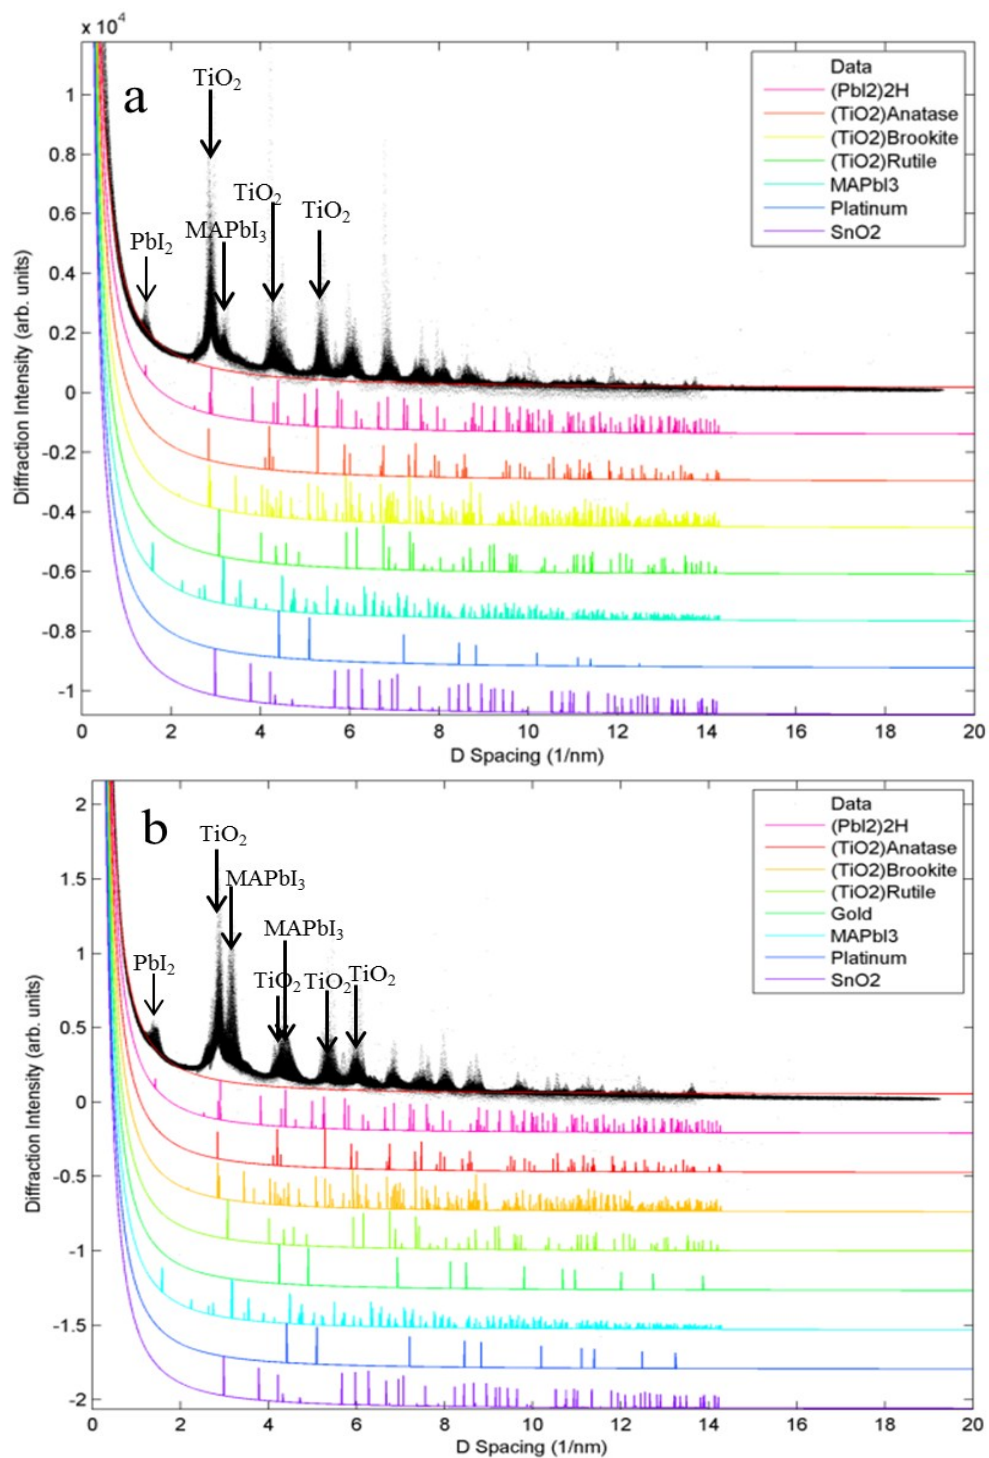

Figure S8 Electron diffraction peak intensity vs. diffraction angle of  $\text{CH}_3\text{NH}_3\text{PbI}_3$  perovskite/ $\text{TiO}_2$  samples fabricated from single deposition of (a) 40 wt% precursor solution and (b) sequential deposition.
